# Supplementary material for: A Large Scale Gene-Centric Association Study of Lung Function in Newly-Hired Female Cotton Textile Workers with Endotoxin Exposure
Source: PLoS One. 2013 Mar 19;8(3):e59035. doi: 10.1371/journal.pone.0059035 (PMC3602449; doi:10.1371/journal.pone.0059035)
Supplement: File S2 — The association results of imputed SNPs and genotyped SNPs 500 kb around targeted SNPs (Table S6). (XLSX) [file pone.0059035.s002.xlsx]

## Sheet: Table S6
ID	Identified SNP	Adjacent SNP (within 500kb, P< 5E-04)	P	Data
1	rs1910047	rs1910047	3.702e-05	genotyped
1	rs1910047	rs1910047	3.702e-05	imputed
1	rs1910047	rs35519587	3.702e-05	imputed
1	rs1910047	rs35875707	3.702e-05	imputed
1	rs1910047	chr12:115124230	5.477e-05	imputed
1	rs1910047	chr12:115124225	7.677e-05	imputed
1	rs1910047	chr12:115124226	7.677e-05	imputed
1	rs1910047	chr12:115124227	7.677e-05	imputed
1	rs1910047	rs12810764	0.0001191	imputed
1	rs1910047	rs12811501	0.0001191	imputed
1	rs1910047	rs1354155	0.0001323	imputed
1	rs1910047	rs35789998	0.0001323	imputed
1	rs1910047	rs61931165	0.0001323	imputed
1	rs1910047	chr12:115124229	0.0001569	imputed
2	rs9469089	chr6:31701345	4.399e-05	imputed
2	rs9469089	chr6:31709318	4.399e-05	imputed
2	rs9469089	chr6:31867137	4.399e-05	imputed
2	rs9469089	chr6:31877654	4.399e-05	imputed
2	rs9469089	chr6:32051866	4.399e-05	imputed
2	rs9469089	chr6:32134056	4.399e-05	imputed
2	rs9469089	rs17207370	4.399e-05	imputed
2	rs9469089	rs16869385	5.65e-05	imputed
2	rs9469089	rs12524510	5.802e-05	imputed
2	rs9469089	rs9469089	5.802e-05	imputed
2	rs9469089	rs9469089	6.187e-05	genotyped
2	rs9469089	chr6:31786704	0.0001478	imputed
2	rs9469089	rs17208000	0.000338	imputed
2	rs9469089	rs3130293	0.0003521	imputed
2	rs9469089	rs3132934	0.000408	imputed
2	rs9469089	rs55746013	0.0004536	imputed
3	rs32588	rs251462	0.0001114	imputed
3	rs32588	rs32585	0.0001114	imputed
3	rs32588	rs32586	0.0001114	genotyped
3	rs32588	rs32586	0.0001114	imputed
3	rs32588	rs32588	0.0001114	genotyped
3	rs32588	rs32588	0.0001114	imputed
3	rs32588	rs32589	0.0001114	genotyped
3	rs32588	rs32589	0.0001114	imputed
3	rs32588	chr5:149192004	0.0001188	imputed
3	rs32588	rs67393352	0.0001188	imputed
3	rs32588	rs32583	0.0001603	imputed
3	rs32588	rs32584	0.0001603	imputed
4	rs4855881	rs2960548	0.0001115	imputed
4	rs4855881	rs1060962	0.0001844	imputed
4	rs4855881	rs11130212	0.0001844	imputed
4	rs4855881	rs11919311	0.0001844	imputed
4	rs4855881	rs12490267	0.0001844	imputed
4	rs4855881	rs12497288	0.0001844	imputed
4	rs4855881	rs1352890	0.0001844	imputed
4	rs4855881	rs1826347	0.0001844	imputed
4	rs4855881	rs1873626	0.0001844	imputed
4	rs4855881	rs2005557	0.0001844	imputed
4	rs4855881	rs2131104	0.0001844	imputed
4	rs4855881	rs2131109	0.0001844	imputed
4	rs4855881	rs2329020	0.0001844	imputed
4	rs4855881	rs35007338	0.0001844	imputed
4	rs4855881	rs35404120	0.0001844	imputed
4	rs4855881	rs4855835	0.0001844	imputed
4	rs4855881	rs4855847	0.0001844	imputed
4	rs4855881	rs4855852	0.0001844	imputed
4	rs4855881	rs4855881	0.0001844	genotyped
4	rs4855881	rs4855881	0.0001844	imputed
4	rs4855881	rs4855883	0.0001844	imputed
4	rs4855881	rs4855884	0.0001844	imputed
4	rs4855881	rs6765869	0.0001844	imputed
4	rs4855881	rs6767878	0.0001844	imputed
5	rs10515978	chr18:57020137	0.0003163	imputed
5	rs10515978	rs10515978	0.0003163	genotyped
5	rs10515978	rs10515978	0.0003163	imputed
5	rs10515978	rs17065749	0.0003163	imputed
5	rs10515978	rs2298712	0.0003163	imputed
5	rs10515978	rs2305042	0.0003163	imputed
5	rs10515978	rs2305044	0.0003163	imputed
5	rs10515978	rs35219613	0.0003163	imputed
5	rs10515978	rs6567080	0.0003163	imputed
5	rs10515978	rs9319949	0.0003163	imputed
6	rs601675	rs601675	0.0003324	genotyped
6	rs601675	rs601675	0.0003324	imputed
7	rs11761231	chr7:131364846	0.0003351	imputed
7	rs11761231	chr7:131365771	0.0003351	imputed
7	rs11761231	chr7:131369330	0.0003351	imputed
7	rs11761231	rs10241519	0.0003351	imputed
7	rs11761231	rs10241657	0.0003351	imputed
7	rs11761231	rs11761231	0.0003351	genotyped
7	rs11761231	rs11761231	0.0003351	imputed
7	rs11761231	rs11972094	0.0003351	imputed
7	rs11761231	rs4348414	0.0003351	imputed
7	rs11761231	rs67805917	0.0003351	imputed
7	rs11761231	rs6943164	0.0003351	imputed
7	rs11761231	rs6971190	0.0003351	imputed
7	rs11761231	rs73723308	0.0003351	imputed
7	rs11761231	rs73723310	0.0003351	imputed
7	rs11761231	rs73723311	0.0003351	imputed
7	rs11761231	rs73723313	0.0003351	imputed
7	rs11761231	rs9641906	0.0003351	imputed
8	rs10129426	chr14:104060626	7.654e-05	imputed
8	rs10129426	rs12432994	7.654e-05	imputed
8	rs10129426	rs4906342	7.654e-05	imputed
8	rs10129426	rs4906359	0.0003697	imputed
8	rs10129426	rs10129426	0.0003884	genotyped
8	rs10129426	rs10129426	0.0003884	imputed
8	rs10129426	rs10141157	0.0003884	imputed
8	rs10129426	rs10149470	0.0003884	imputed
8	rs10129426	rs2403193	0.0004246	imputed
8	rs10129426	rs61996704	0.0004246	imputed
8	rs10129426	rs942866	0.0004246	imputed
9	rs10201627	chr2:231768442	0.0004413	imputed
9	rs10201627	chr2:231768515	0.0004413	imputed
9	rs10201627	chr2:231778343	0.0004413	imputed
9	rs10201627	rs10201627	0.0004413	genotyped
9	rs10201627	rs10201627	0.0004413	imputed
9	rs10201627	rs16827632	0.0004413	imputed
9	rs10201627	rs34006254	0.0004413	imputed
9	rs10201627	rs3906759	0.0004413	imputed
9	rs10201627	rs55658478	0.0004413	imputed
9	rs10201627	rs55846442	0.0004413	imputed
9	rs10201627	rs55933409	0.0004413	imputed
9	rs10201627	rs55946917	0.0004413	imputed
9	rs10201627	rs67321230	0.0004413	imputed
9	rs10201627	rs6759606	0.0004413	imputed
9	rs10201627	rs72997227	0.0004413	imputed
9	rs10201627	rs72997233	0.0004413	imputed
9	rs10201627	rs72997240	0.0004413	imputed
10	rs1049970	rs1049970	0.0004629	genotyped
